# Supplementary material for: PNIPAM-immobilized gold-nanoparticles with colorimetric temperature-sensing and reusable temperature-switchable catalysis properties
Source: Royal Society of Chemistry journal article supplement (doi:10.1039/d1py01180d), 2021-01-01
Supplement: d1py01180d1.pdf [file d1py01180d1.pdf]

Electronic Supplementary Information

# PNIPAM-immobilized Gold-nanoparticles with Colorimetric Temperature-sensor and Reusable Temperature-switchable Catalysis Properties

*Si Wu,<sup>a</sup> Lei Lei,<sup>\*b</sup> Yuzheng Xia,<sup>a</sup> Susan Oliver,<sup>b</sup> Xiaonong Chen,<sup>a</sup> Cyrille Boyer,<sup>b</sup> Zhiyong Nie,<sup>\*c</sup>  
and Shuxian Shi <sup>\*a</sup>*

<sup>a</sup> College of Materials Science and Engineering, Beijing University of Chemical Technology,  
Beijing 100029, China

<sup>b</sup> Centre for Advanced Macromolecular Design, School of Chemical Engineering, University of  
New South Wales, Sydney, NSW 2052, Australia

<sup>c</sup> Institute of Pharmacology and Toxicology, Academy of Military Medical Sciences, Beijing,  
100850, China

\*Correspondence to: S. Shi (shisx@mail.buct.edu.cn), L. Lei (lei.lei@unsw.edu.au) and Z. Nie  
(niezhiyong2018@sina.com).

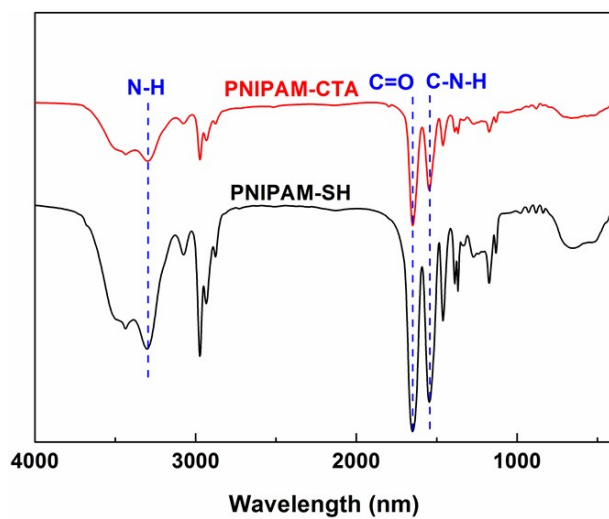

**Fig. S1** FTIR spectra of PNIPAM<sub>6100</sub>-CTA and PNIPAM<sub>6900</sub>-SH.

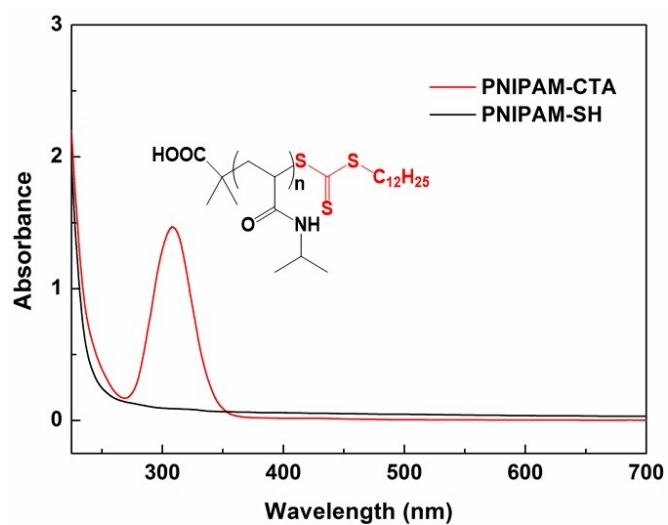

**Fig. S2** UV-vis absorption spectra of PNIPAM<sub>6100</sub>-CTA and PNIPAM<sub>6900</sub>-SH.

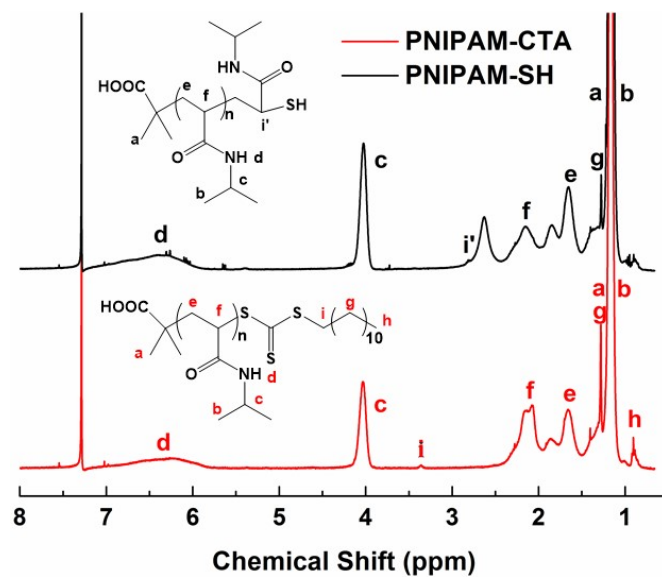

**Fig. S3** <sup>1</sup>H-NMR spectra of PNIPAM<sub>6100</sub>-CTA and PNIPAM<sub>6900</sub>-SH.

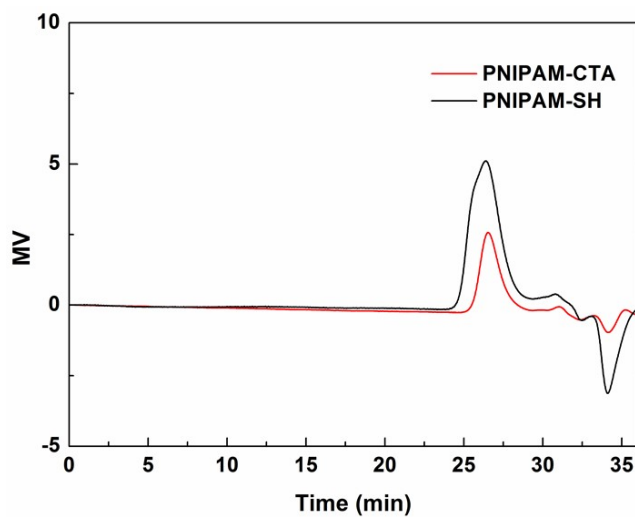

**Fig. S4** GPC curves of PNIPAM<sub>6100</sub>-CTA and PNIPAM<sub>6900</sub>-SH.

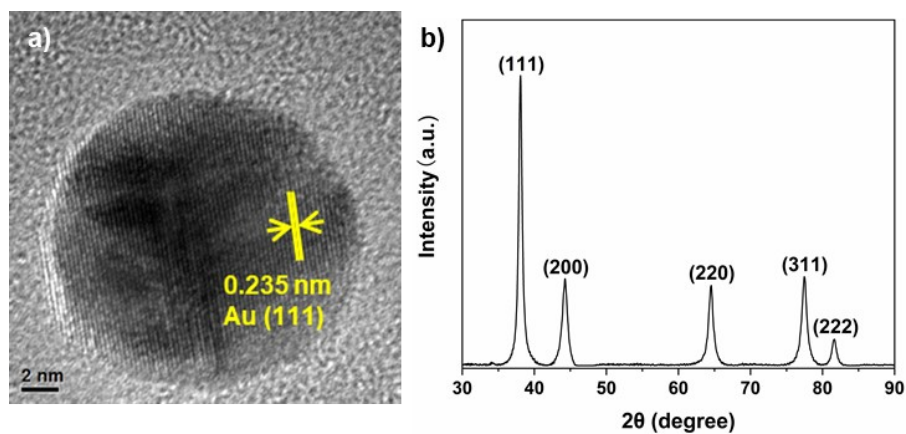

**Fig. S5** The crystal structure of AuNPs obtained by TEM and XRD.

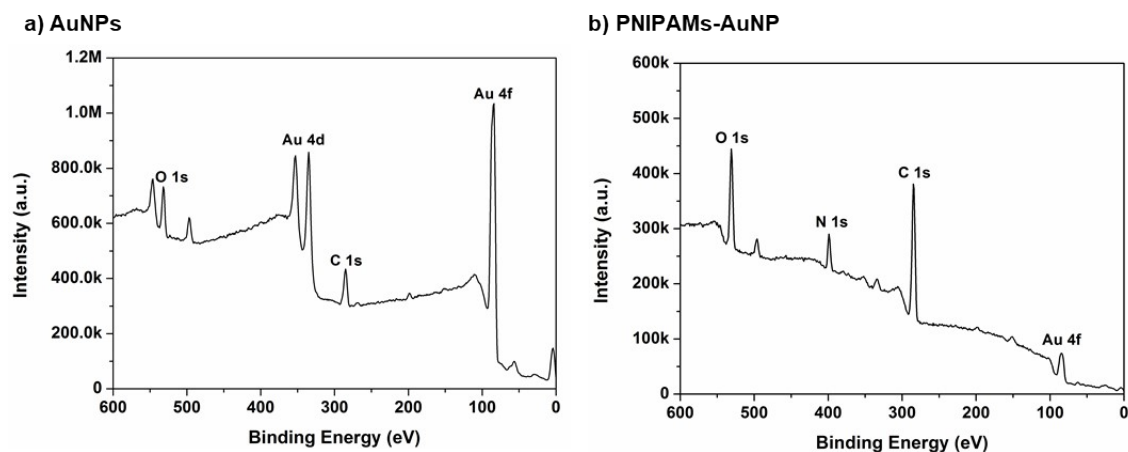

**Fig. S6** The elemental analysis of AuNPs and PNIPAMs<sub>6900</sub>-AuNP by XPS.

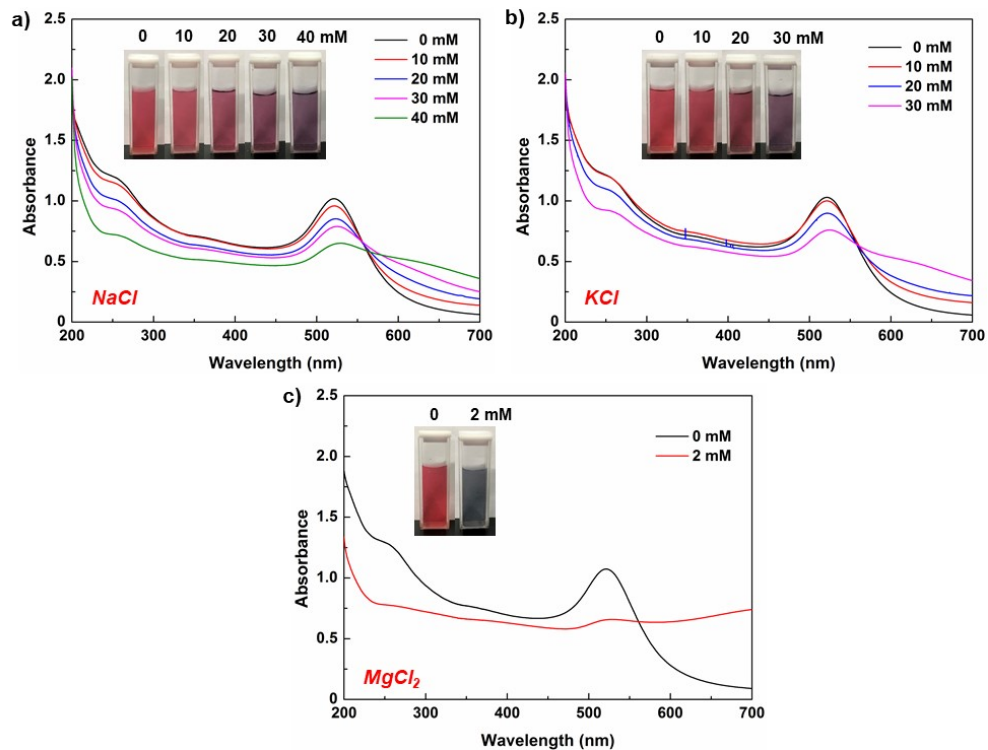

**Fig. S7** UV-vis absorbance spectra of AuNPs aqueous dispersion for different salt types and concentrations at 25 °C: a) NaCl; b) KCl; c) MgCl<sub>2</sub>. The insets show the irreversible color changes with salt concentrations.

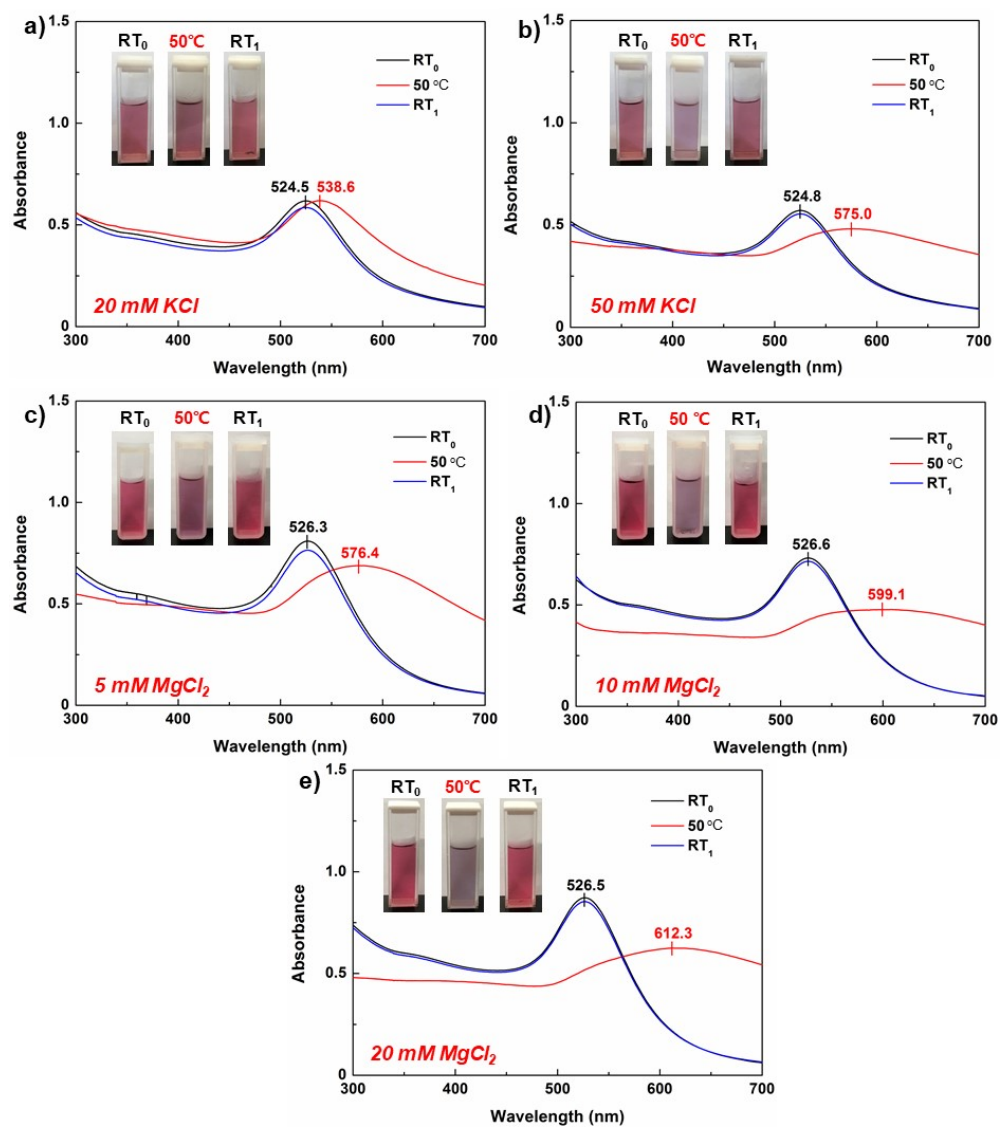

**Fig. S8** UV-vis absorbance spectra of PNIPAMs<sub>6900</sub>-AuNP aqueous dispersion with a) 20 mM and b) 50 mM of KCl; c) 5 mM, d) 10 mM and e) 20 mM of MgCl<sub>2</sub> from 25 °C to 50 °C. The insets show the reversible color change from 25 °C to 50 °C. RT<sub>0</sub> represents the initial dispersion at 25 °C, RT<sub>1</sub> represents the dispersion after cooling from 50 °C to 25 °C.

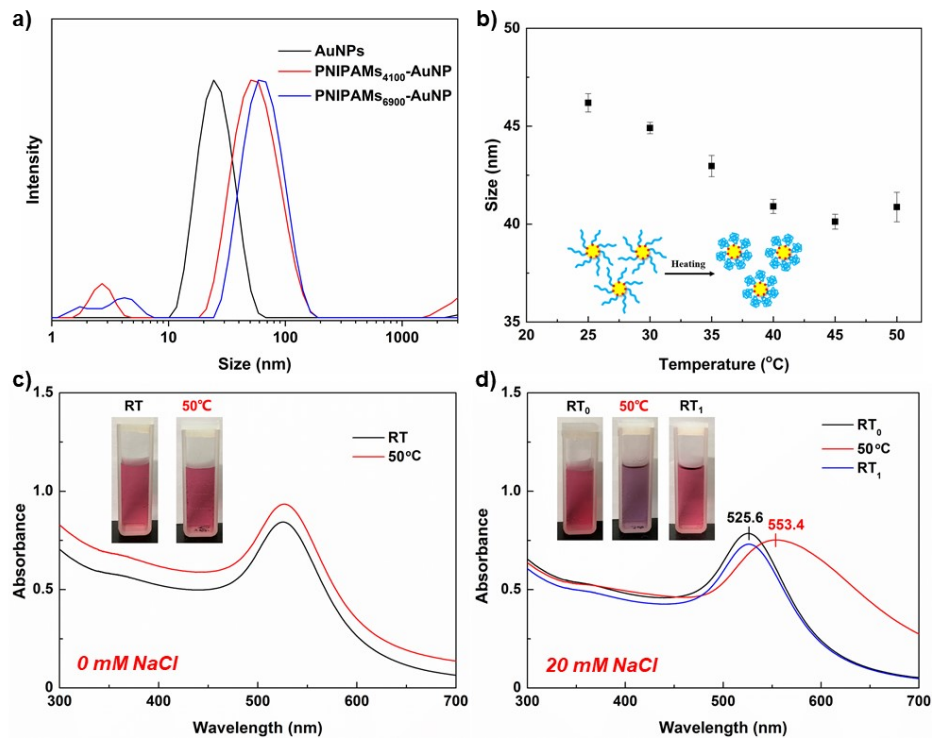

**Fig. S9** a) The size distributions of AuNPs and PNIPAMs-AuNP obtained via DLS measured at 25 °C. b) The hydrodynamic size of PNIPAMs<sub>4100</sub>-AuNP hybrid nanoparticles at different temperatures measured by DLS. c) UV-vis absorbance spectra of PNIPAMs<sub>4100</sub>-AuNP dispersion without NaCl from 25 °C to 50 °C. d) UV-vis absorbance spectra of PNIPAMs<sub>4100</sub>-AuNP dispersion with 20 mM NaCl from 25 °C to 50 °C. The inset shows the dispersion's color change with temperature.

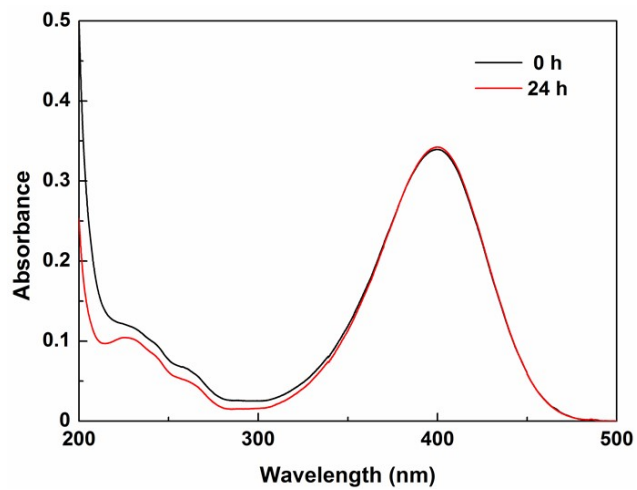

**Fig. S10** UV-vis absorption spectra of reduction of 4-NP without PNIPAMs-AuNP catalyst.

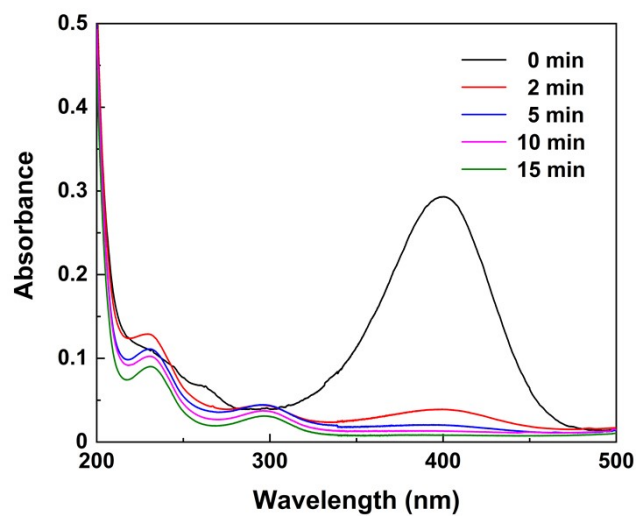

**Fig. S11** UV-vis absorption spectra of 4-NP reduction catalyzed by AuNPs at 25 °C.
